# Supplementary material for: Physicochemical and tribophysical properties of trioctylalkylammonium bis(salicylato)borate (N888n-BScB) ionic liquids: effect of alkyl chain length
Source: Royal Society of Chemistry journal article supplement (doi:10.1039/c6cp05990b), 2017-01-01
Supplement: c6cp05990b1.pdf [file c6cp05990b1.pdf]

## Supporting Information

### **Physicochemical and Tribophysical Properties of Trioctylalkylammonium-bis(salicylato)borate (N888n- BScB) Ionic Liquids: Effect of Alkyl Chain Length**

Rashi Gusain,<sup>1,†</sup> Paramjeet S. Bakshi,<sup>1,†</sup> Somenath Panda,<sup>2</sup> Om P. Sharma,<sup>1</sup> Ramesh Gardas<sup>2</sup>  
and Om P. Khatri<sup>1,\*</sup>

<sup>1</sup> *Chemical Science Division, CSIR-Indian Institute of Petroleum, Dehradun – 248005, India*

<sup>2</sup> *Department of Chemistry, Indian Institute of Technology Madras, Chennai – 600036, India*

† These authors contributed equally to this work

Corresponding Author: \*Email: [opkhatri@iip.res.in](mailto:opkhatri@iip.res.in)

## **<sup>1</sup>H and <sup>13</sup>C NMR Characterization of Ionic Liquids**

***Trioctylhexylammonium bis(salicylato)borate (N8886-BScB)***: <sup>1</sup>H NMR (ppm): 0.84-0.93 (t, 12H, N(CH<sub>2</sub>)<sub>7</sub>CH<sub>3</sub>, N(CH<sub>2</sub>)<sub>5</sub>CH<sub>3</sub>), 1.25-1.36 (m, 36H, N(CH<sub>2</sub>)<sub>2</sub>(CH<sub>2</sub>)<sub>5</sub>, N(CH<sub>2</sub>)<sub>2</sub>(CH<sub>2</sub>)<sub>3</sub>), 1.62-1.78 (m, 8H, NCH<sub>2</sub>CH<sub>2</sub>), 2.82-2.85 (t, 8H, NCH<sub>2</sub>), 6.86-6.90 (m, 4H, C<sub>6</sub>H<sub>4</sub>), 7.39-7.40 (m, 2H, C<sub>6</sub>H<sub>4</sub>), 7.87-7.89 (dd, 2H, C<sub>6</sub>H<sub>4</sub>). <sup>13</sup>C NMR (ppm): 14.01, 14.13, 22.55, 22.61, 23.96, 25.64, 26.17, 26.92, 28.52, 28.99, 29.12, 31.42, 31.62, 31.70, 52.63, 112.61, 114.76, 117.60, 118.91, 119.21, 129.70, 130.67, 132.52, 135.59, 166.52, 170.27, 174.81.

***Tetraoctylammonium bis(salicylato)borate (N8888-BScB)***: <sup>1</sup>H NMR (ppm): 0.86-0.90 (t, 12H, N(CH<sub>2</sub>)<sub>7</sub>CH<sub>3</sub>), 1.20-1.26 (m, 40H, N(CH<sub>2</sub>)<sub>2</sub>(CH<sub>2</sub>)<sub>5</sub>), 1.76-1.79 (m, 8H, NCH<sub>2</sub>CH<sub>2</sub>), 2.87-2.90 (t, 8H, NCH<sub>2</sub>), 6.86-6.90 (m, 4H, C<sub>6</sub>H<sub>4</sub>), 7.39-7.40 (m, 2H, C<sub>6</sub>H<sub>4</sub>), 7.86-7.88 (dd, 2H, C<sub>6</sub>H<sub>4</sub>). <sup>13</sup>C NMR (ppm): 14.10, 21.87, 22.62, 23.82, 25.98, 26.20, 26.74, 28.56, 29.08, 29.19, 29.31, 29.53, 31.65, 31.71, 31.90, 32.68, 52.84, 58.72, 112.58, 114.95, 117.45, 118.51, 119.16, 129.74, 129.90, 135.05, 135.60, 159.52, 161.64, 166.25, 170.27.

***Trioctyldecylammonium bis(salicylato)borate (N88810-BScB)***: <sup>1</sup>H NMR (ppm): 0.82-0.91 (t, 12H, N(CH<sub>2</sub>)<sub>7</sub>CH<sub>3</sub>, N(CH<sub>2</sub>)<sub>9</sub>CH<sub>3</sub>), 1.21-1.43 (m, 44H, N(CH<sub>2</sub>)<sub>2</sub>(CH<sub>2</sub>)<sub>5</sub>, N(CH<sub>2</sub>)<sub>2</sub>(CH<sub>2</sub>)<sub>7</sub>), 1.76-1.79 (m, 8H, NCH<sub>2</sub>CH<sub>2</sub>), 2.85-2.88 (t, 8H, NCH<sub>2</sub>), 6.75-6.95 (m, 4H, C<sub>6</sub>H<sub>4</sub>), 7.40-7.43 (m, 2H, C<sub>6</sub>H<sub>4</sub>), 7.86-7.90 (dd, 2H, C<sub>6</sub>H<sub>4</sub>). <sup>13</sup>C NMR (ppm): 14.10, 22.63, 22.70, 26.90, 27.08, 28.92, 29.15, 29.22, 29.32, 29.50, 31.74, 31.90, 32.67, 45.20, 52.69, 53.49, 114.64, 116.33, 117.50, 117.62, 118.67, 119.25, 119.69, 130.65, 132.55, 135.26, 159.55, 161.64, 161.76, 166.70, 174.87.

***Trioctyldodecylammonium bis(salicylato)borate (N88812-BScB)***: <sup>1</sup>H NMR (ppm): 0.85-0.89 (t, 12H, N(CH<sub>2</sub>)<sub>7</sub>CH<sub>3</sub>, N(CH<sub>2</sub>)<sub>11</sub>CH<sub>3</sub>), 1.20-1.45 (m, 48H, N(CH<sub>2</sub>)<sub>2</sub>(CH<sub>2</sub>)<sub>5</sub>, N(CH<sub>2</sub>)<sub>2</sub>(CH<sub>2</sub>)<sub>9</sub>), 1.64-1.86 (m, 8H, NCH<sub>2</sub>CH<sub>2</sub>), 2.82-2.85 (t, 8H, NCH<sub>2</sub>), 6.86-6.96 (m, 4H, C<sub>6</sub>H<sub>4</sub>), 7.34-7.44 (m, 2H, C<sub>6</sub>H<sub>4</sub>), 7.83-7.88 (dd, 2H, C<sub>6</sub>H<sub>4</sub>). <sup>13</sup>C NMR (ppm): 14.09, 14.14, 21.88, 22.62, 22.72, 24.00, 25.99, 26.21, 26.88, 28.21, 28.58, 29.02, 29.26, 29.38, 29.48,

29.53, 29.58, 31.65, 31.72, 32.88, 34.02, 52.53, 58.77, 112.61, 114.88, 117.48, 118.57, 119.12, 129.74, 129.90, 135.10, 135.58, 159.56, 161.68, 166.40, 170.27.

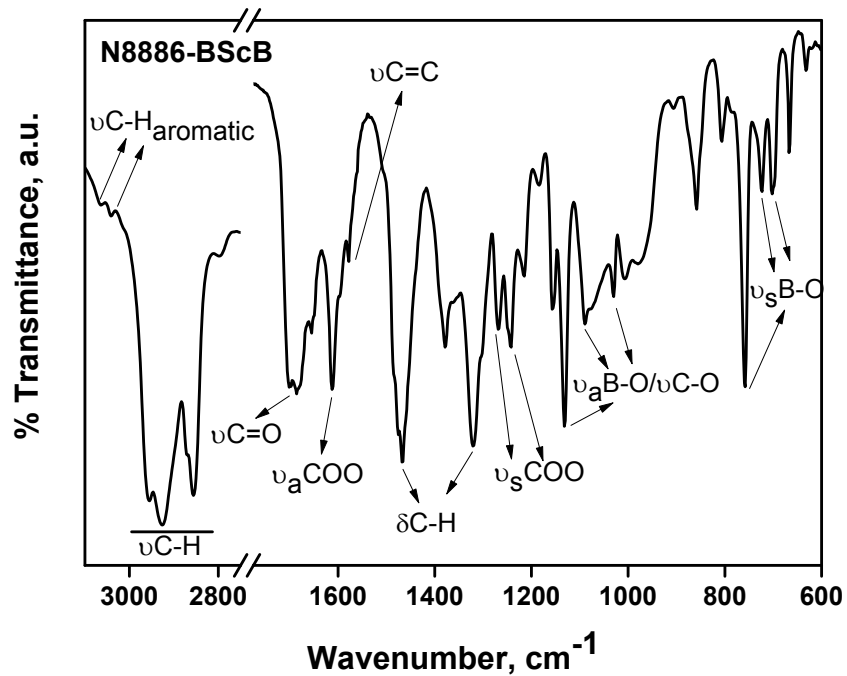

**Figure S1:** FTIR spectrum of N8886-BScB as a representative ionic liquid.

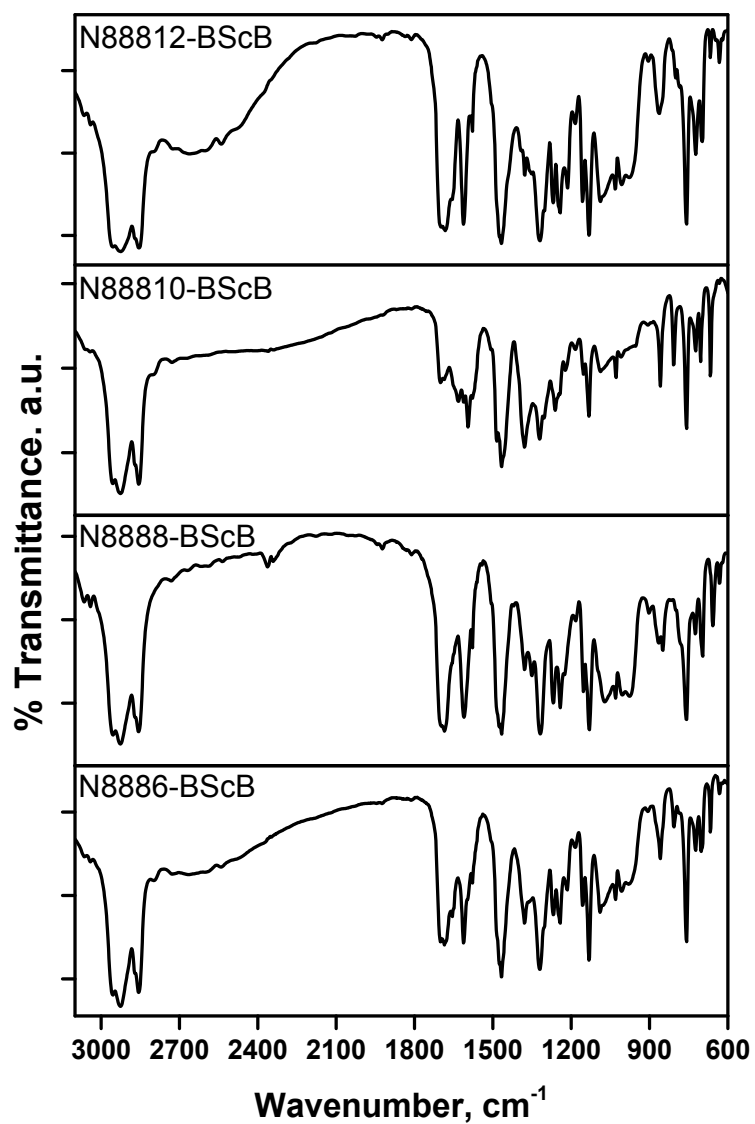

**Figure S2.** FTIR spectra of N8886-BScB, N8888-BScB, N88810-BScB and N88812-BScB ionic liquids

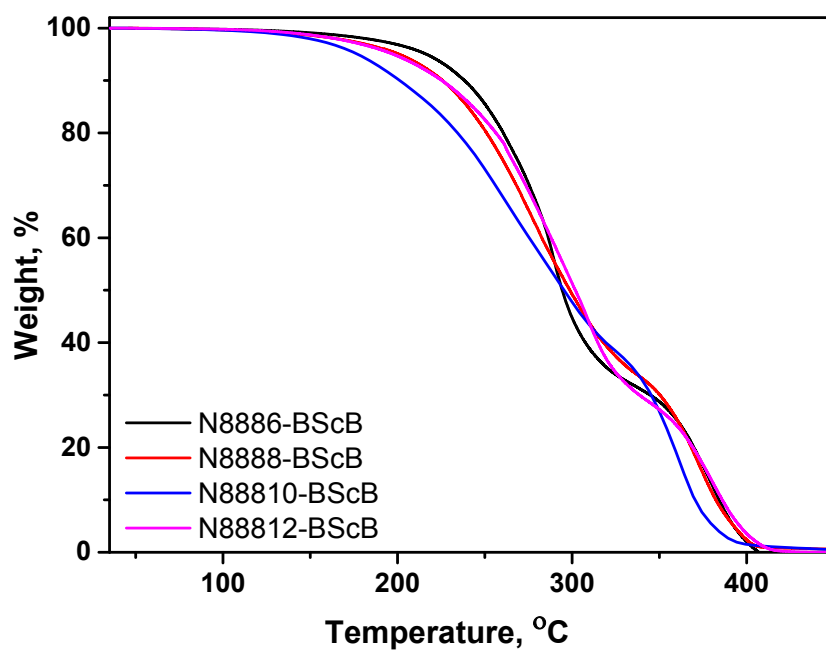

**Figure S3:** Thermal decomposition patterns of N8886-BScB, N8888-BScB, N88810-BScB and N88812-BScB ionic liquids at thermal rate of  $10\text{ }^{\circ}\text{C}\cdot\text{min}^{-1}$  under the nitrogen flow.

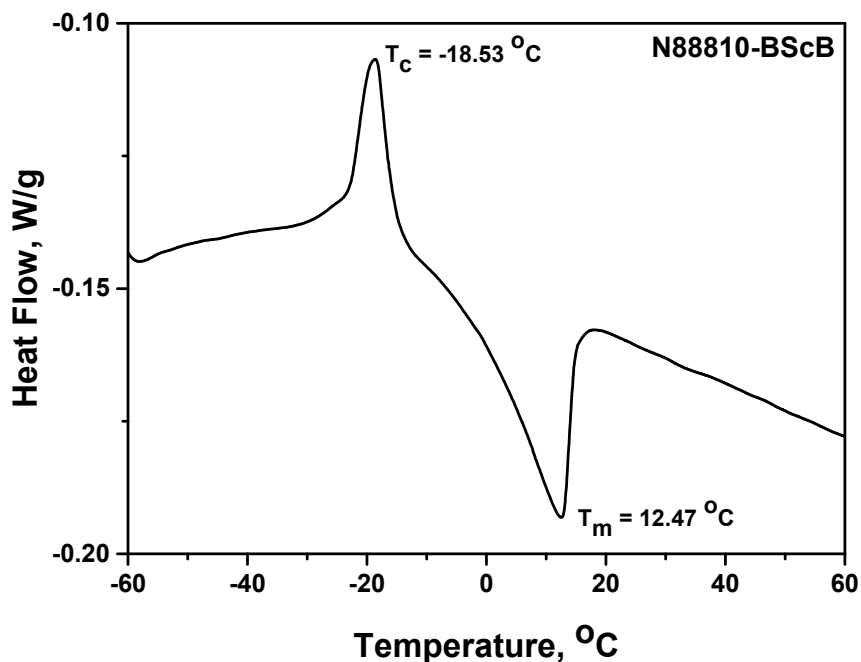

**Figure S4:** Differential scanning calorimetric pattern of N88810-BScB ionic liquids as a representative ionic liquid.

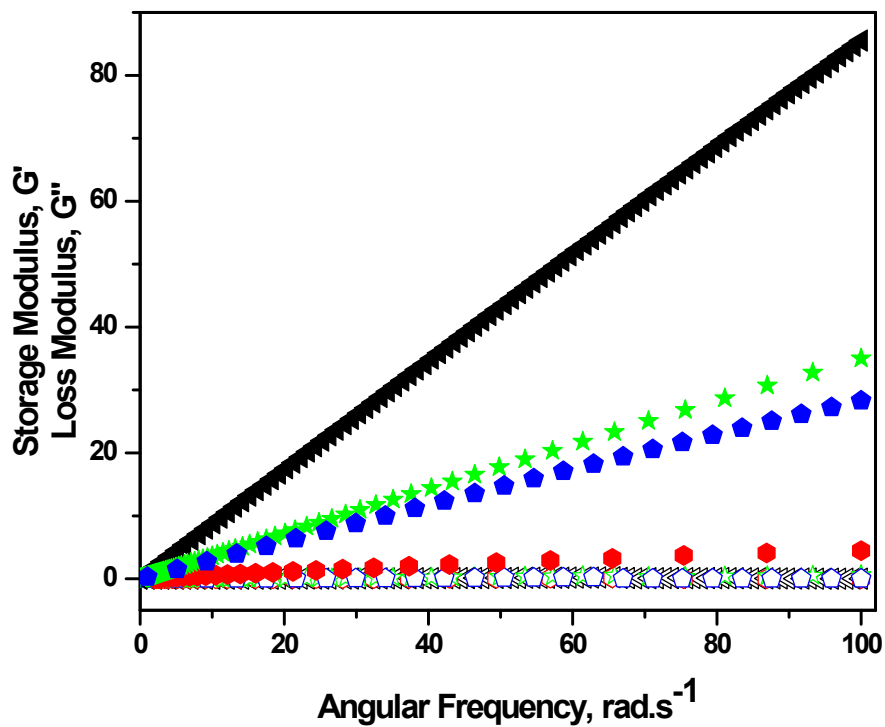

**Figure S5:** Storage modulus ( $G'$ , hollow symbols) and loss modulus ( $G''$ , filled symbols) as a function of angular frequency for N888n-BScB ionic liquids. Black, red, green and blue color symbols represent N8886-BScB, N8888-BScB, N88810-BScB and N88812-BScB, respectively.

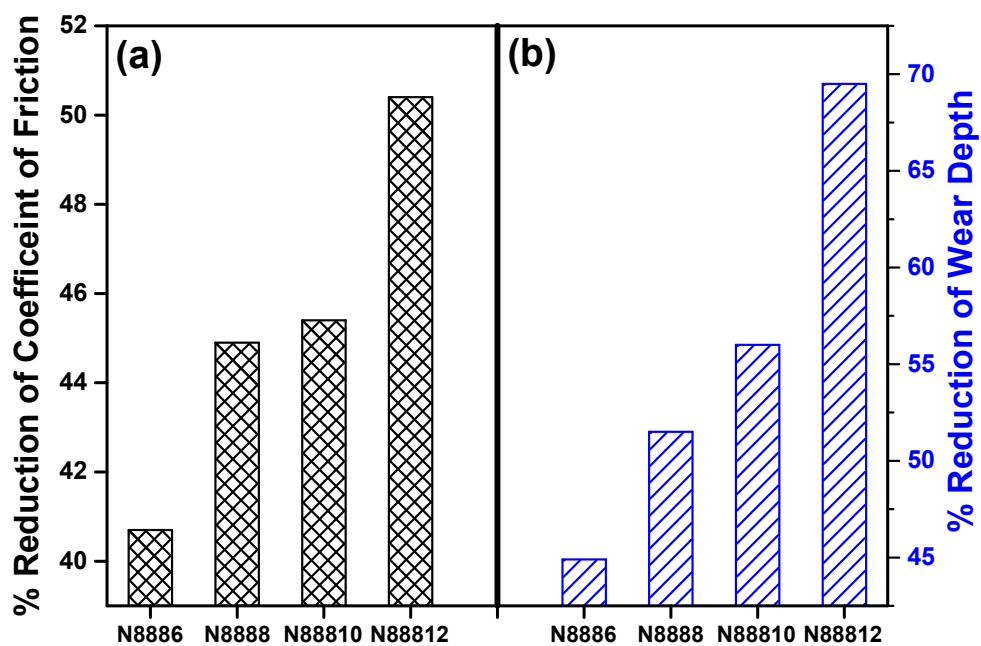

**Figure S6:** % Reduction of (a) coefficient of friction and (b) wear depth of N888n-BScB (n = 6, 8, 10 and 12) ionic liquids-lubricated aluminium disc compared to PEG 300 lube oil. after 5000 cyclic laps. Lubrication characteristics of PEG 300 lube base oil are plotted for a comparison. A steel ball ( $\phi = 2$  mm) was used as counter sliding body. Load: 100 mN, cyclic speed: 50 rpm.

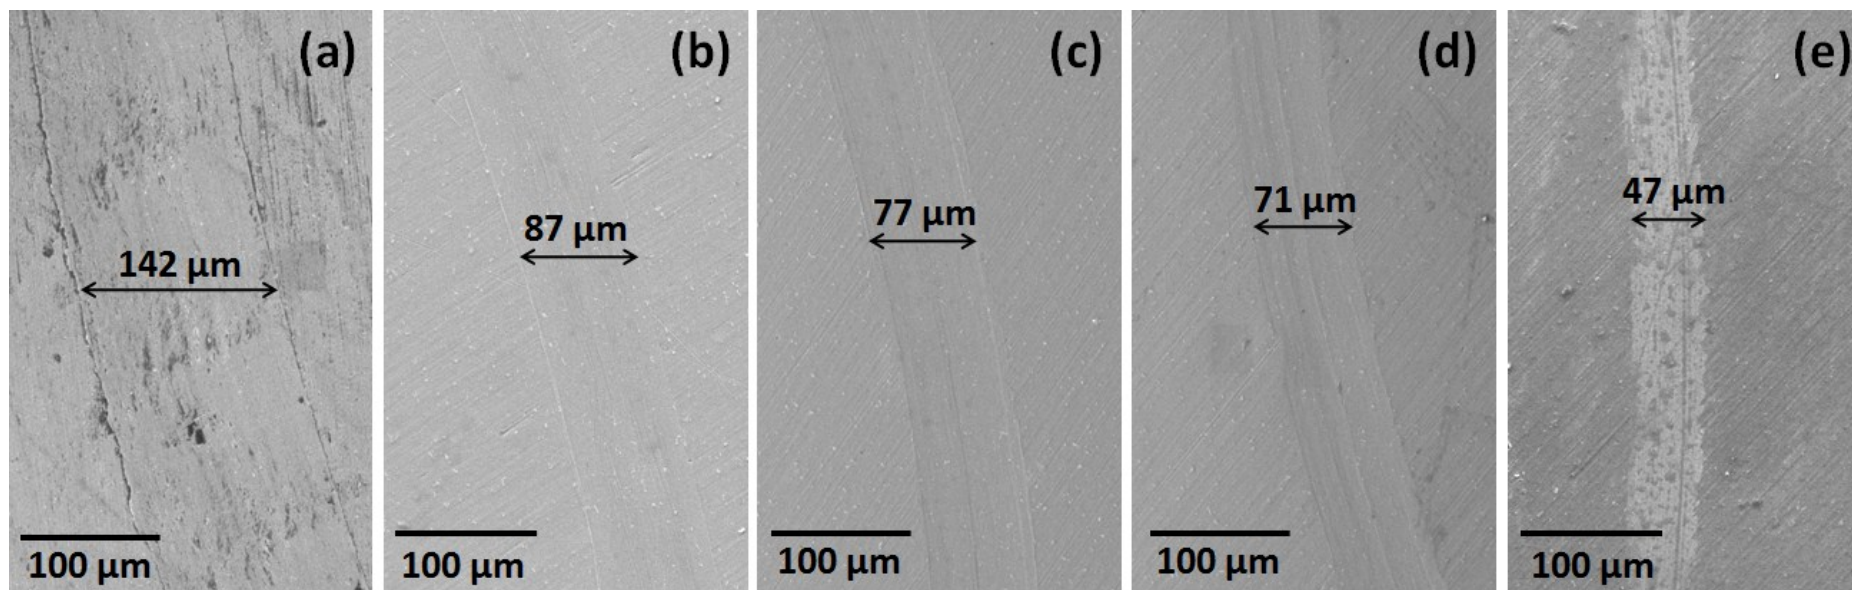

**Figure S7:** Changes in wear track width on the aluminium disc lubricated with (a) PEG 300 synthetic lube oil, (b) N8886-BScB, (c) N8888-BScB, (d) N88810-BScB and (e) N88812-BScB ionic liquids after 5000 cyclic laps. A steel ball ( $\phi = 2$  mm) was used as counter sliding body. Load: 100 mN, cyclic speed: 50 rpm.



**Table S1:** Infrared vibrational assignments of characteristics vibrational features of N888n-BScB ionic liquids

| N8886-BScB,<br>cm <sup>-1</sup> | N8888-BScB,<br>cm <sup>-1</sup> | N88810-BScB,<br>cm <sup>-1</sup> | N88812-BScB,<br>cm <sup>-1</sup> | Vibrational Assignment                                              |
|---------------------------------|---------------------------------|----------------------------------|----------------------------------|---------------------------------------------------------------------|
| 3071, 3042                      | 3070, 3042                      | 3063                             | 3070, 3042                       | $\nu(\text{C-H})$ , aromatic ring                                   |
| 2957, 2921, 2857                | 2957, 2928, 2850                | 2957, 2928, 2850                 | 2957, 2921, 2850                 | $\nu_a/\nu_s(\text{C-H})$ , CH <sub>2</sub> /CH <sub>3</sub> groups |
| 1687                            | 1680                            | 1701                             | 1701                             | $\nu(\text{C=O})$                                                   |
| 1610                            | 1609                            | 1595                             | 1616                             | $\nu_a(\text{COO})$                                                 |
| 1573                            | 1573                            | 1574                             | 1573                             | $\nu(\text{C=C})$ , aromatic                                        |
| 1467, 1375, 1319                | 1467, 1375, 1318                | 1467, 1382, 1318                 | 1467, 1375, 1318                 | $\delta\text{C-H}$ , CH <sub>2</sub> /CH <sub>3</sub> groups        |
| 1270, 1240                      | 1269, 1240                      | 1261, 1240                       | 1269, 1240                       | $\nu_s(\text{COO})$                                                 |
| 1200-900                        | 1200-900                        | 1200-900                         | 1200-900                         | $\nu_a(\text{B-O})/\nu(\text{C-O})$                                 |
| 758, 722, 701                   | 758, 722, 695                   | 758, 722, 701                    | 758, 722, 701                    | $\nu_s(\text{B-O})$                                                 |
